# Supplementary material for: Polyphenolic Proanthocyanidin-B2 suppresses proliferation of liver cancer cells and hepatocellular carcinogenesis through directly binding and inhibiting AKT activity
Source: PubMed Central journal article supplement — Redox Biol. 2020 Aug 25;37:101701. doi: 10.1016/j.redox.2020.101701 (PMC7472926; doi:10.1016/j.redox.2020.101701), 2020-08-25
Supplement: mmc1.pdf [file mmc1.pdf]

## Supplemental information

### **Polyphenolic Proanthocyanidin-B2 Suppresses Proliferation of Liver Cancer Cells and Hepatocellular Carcinogenesis through Directly Binding and Inhibiting AKT Activity**

Guijun Liu<sup>1,2#</sup>, Aimin Shi<sup>3#</sup>, Ningning Wang<sup>1,2</sup>, Min Li<sup>1,2</sup>, Xuxiao He<sup>1,2</sup>, Chunzhao Yin<sup>2,5</sup>, Qiaochu Tu<sup>2,5</sup>, Xia Shen<sup>2,5</sup>, Yongzhen Tao<sup>1\*</sup>, Qiang Wang<sup>3\*</sup>, Huiyong Yin<sup>1,2,4-6\*</sup>

#### **Supplemental figures legends**

**Figure S1. Characterization of OPC-B2 by high resolution LC-MS and inhibition of cell proliferation in different liver cancer cell lines, related to Figure 1.**

**A.** Full scan (MS<sup>1</sup>) of purified OPC-B2 from peanut skin using a high resolution Q-TOF-MS instrument. The difference of detected molecular ion and the theoretical value is 1.78 ppm in the negative ion mode. **B.** Cell viability of SMMC-7721 and LM3 cells treated with various concentrations of OPC-B2 at 24 and 48 hours. **C.** Dose-dependency on cell viability of different HCC cell lines treated with indicated concentrations for 48 hours. \*p < 0.05; \*\*p < 0.01; \*\*\*p < 0.001.

**Figure S2. OPC-B2 directly binds to AKT and inhibits its activity, related to Figure 2.**

**A.** Immunoblots of cell lysates of Huh7 cells treatment with OPC-B2 (0, 50, and 75µg/ml) for 24 hours. **B.** Immunoblots of cell lysates of Huh7 cells treatment with 1X PBS or OPC-B2 (75µg/ml), followed by treatment with MK-2206 (0.5µM) for 24 hours. **C.** Cell numbers of Huh7 cells treated with control solvent or OPC-B2 (50 and 75µg/ml), followed by treatment with MK-2206 (2µM), measured by CCK8 kit. **D.** Immunoblot for upstream kinase expression of AKT in Huh7 cells treat with different concentrations of OPC-B2. **E.** Interactions between OPC-B2 and AKT1 amino acid residues. **F.** Immunoblot analysis of Huh7 cell lysates transfected with Myc-AKT1,

Myc-AKT1 (R86A), Myc-AKT1 (R273A) and Myc-AKT1 (K297A). **G.** Cell viability of Huh7 cells transfected with Myc-AKT1, Myc-AKT1 (K297A) and Myc-AKT1 (R86A) at different time points. **H.** Immunoblots of cell lysates of Huh7 cells transfected with myc-AKT1, myc-AKT1 (K297A) and myc-AKT1 (R86A), followed by treatment with DMSO or MK-2206 (0.5  $\mu$ M) for 24 hours. The upper band is the exogenously overexpressed AKT1 protein and the lower band is the endogenous AKT1 protein. **I.** Cell numbers of Huh7 cells transfected with myc-AKT1, myc-AKT1 (K297A) and myc-AKT1 (R86A), followed by treatment with DMSO or MK-2206 (2  $\mu$ M) for 72 hours. \* $p < 0.05$ ; \*\* $p < 0.01$ ; \*\*\* $p < 0.001$ .

**Figure S3. OPC-B2 affects transcription and induces cell cycle arrest at G1 without affecting apoptosis, related to Figure 3.**

**A.** Heat map of the clustering of differentially expressed genes (DEGs) transcripts in control and OPC-B2 (75  $\mu$ g/ml) treated Huh7 cells. **B.** Volcano-plot of differentially expressed genes (DEGs) after log<sub>2</sub> transformation. **C.** Cell cycle related genes expression profiles from clustering analysis of Huh7 cells treatment with OPC-B2 (75 $\mu$ g/ml). **D.** Enriched KEGG pathways of DEGs analysis. **E, F.** Cell cycle distribution of SMMC-7721 cells measured by flow cytometry after treatment with OPC. **G.** The protein expression levels of cyclin D1, phosphor-CDK4, and CDK4 were detected by western blotting assays after treatment with OPC-B2 (0, 25 and 75  $\mu$ g/ml). **H.** Immunoblot analysis of proteins in apoptotic pathways in Huh7 cells treated with OPC-B2 (0, 50 and 75 $\mu$ g/ml) for 24 hours. **I.** Effects of OPC-B2 on apoptosis by Annexin-V and propidium iodide (PI) double staining.

**Figure S4. OPC-B2 promotes cyclin D1 degradation and ubiquitination, related to Figure 3.**

**A.** Immunoblot analysis of Huh7 cells treated with OPC-B2 (0, 50, and 75µg/ml) for 24 hours. **B, C.** Cyclin D1 expression in Huh7 cells exposed to vehicle or OPC-B2 (50 µg/ml) for 24h, followed by treatment with cycloheximide (CHX, 10µg/ml). **D.** Polyubiquitination levels of affinity purified cyclin D1-Flag proteins were detected by western blotting in transfected SMMC-7721 cells upon treatment with 1X PBS or OPC-B2 (50 µg/ml). **E.** Immunoblot analysis of protein synthesis in Huh7 cells treated with OPC-B2 (0, 50, and 75µg/ml) for 24 hours. **F.** Quantification of total proteins in Huh7 cells after treatment with OPC-B2 (0 and 75µg/ml).

**Figure S5. Metabolic flux from [U-<sup>13</sup>C]-glucose in glycolysis and TCA cycle, related to Figure 4.**

**A, B** Metabolic flux of glycolysis and TCA cycle. The ratio enrichment labelled carbons of different metabolites from [U-<sup>13</sup>C]-glucose in glycolysis and TCA cycle upon treatment with OPC-B2 at dose of 0, 50 and 75 µg/ml for 12 (**A**) and 24 (**B**) hours. \*p < 0.05; \*\*p < 0.01; \*\*\*p < 0.001.

**Figure S6. Body weights, liver/body weight ratios, and enzymes of liver function of C57BL/6 mice, related to Figure 5.**

**A.** Body weights of C57BL/6 mice during the experiment period. **B.** Liver /body weight ratios of mice. **C.** ALT, AST levels of C57BL/6 mice treated with the CK (control solvent), OPC-B2 or MK-2206. \*p < 0.05.

Figure S1:

A

Sample: OPC-B2  
Negative ion mode

molecular weight at negative ion mode: 577.1314  
 $\Delta=1.78 < 5$

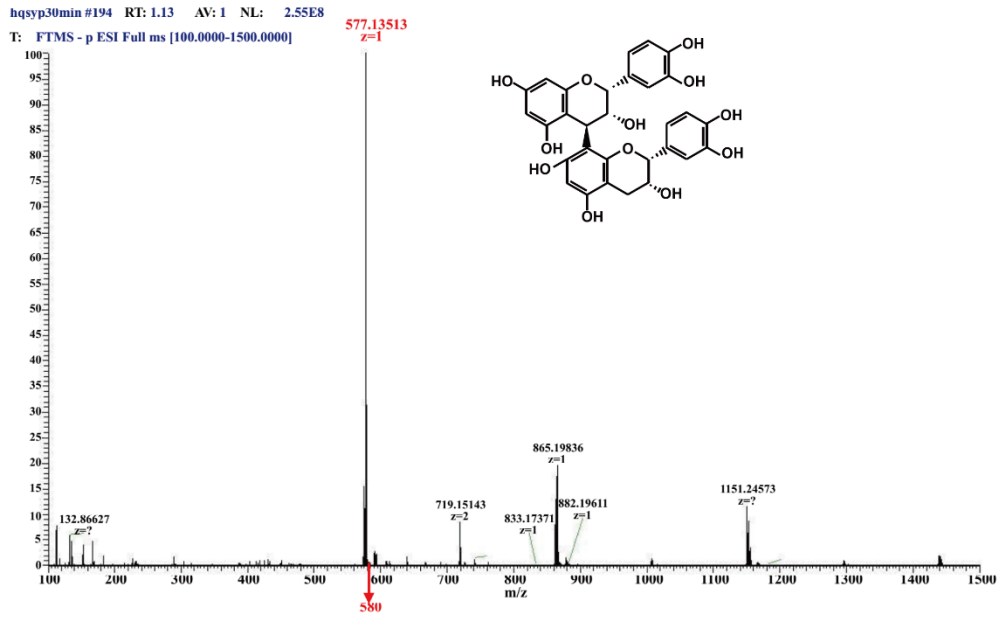

B

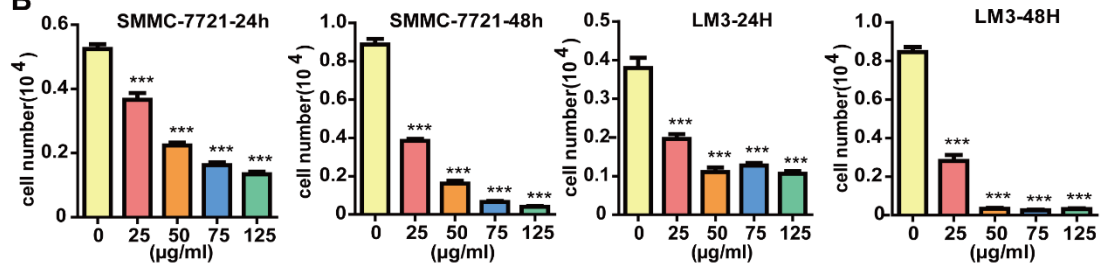

C

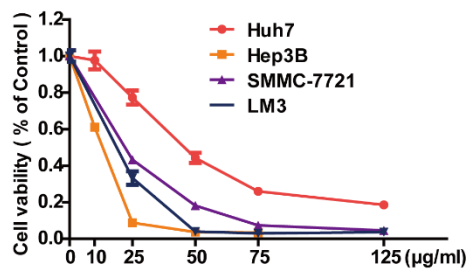

**Figure S2:**

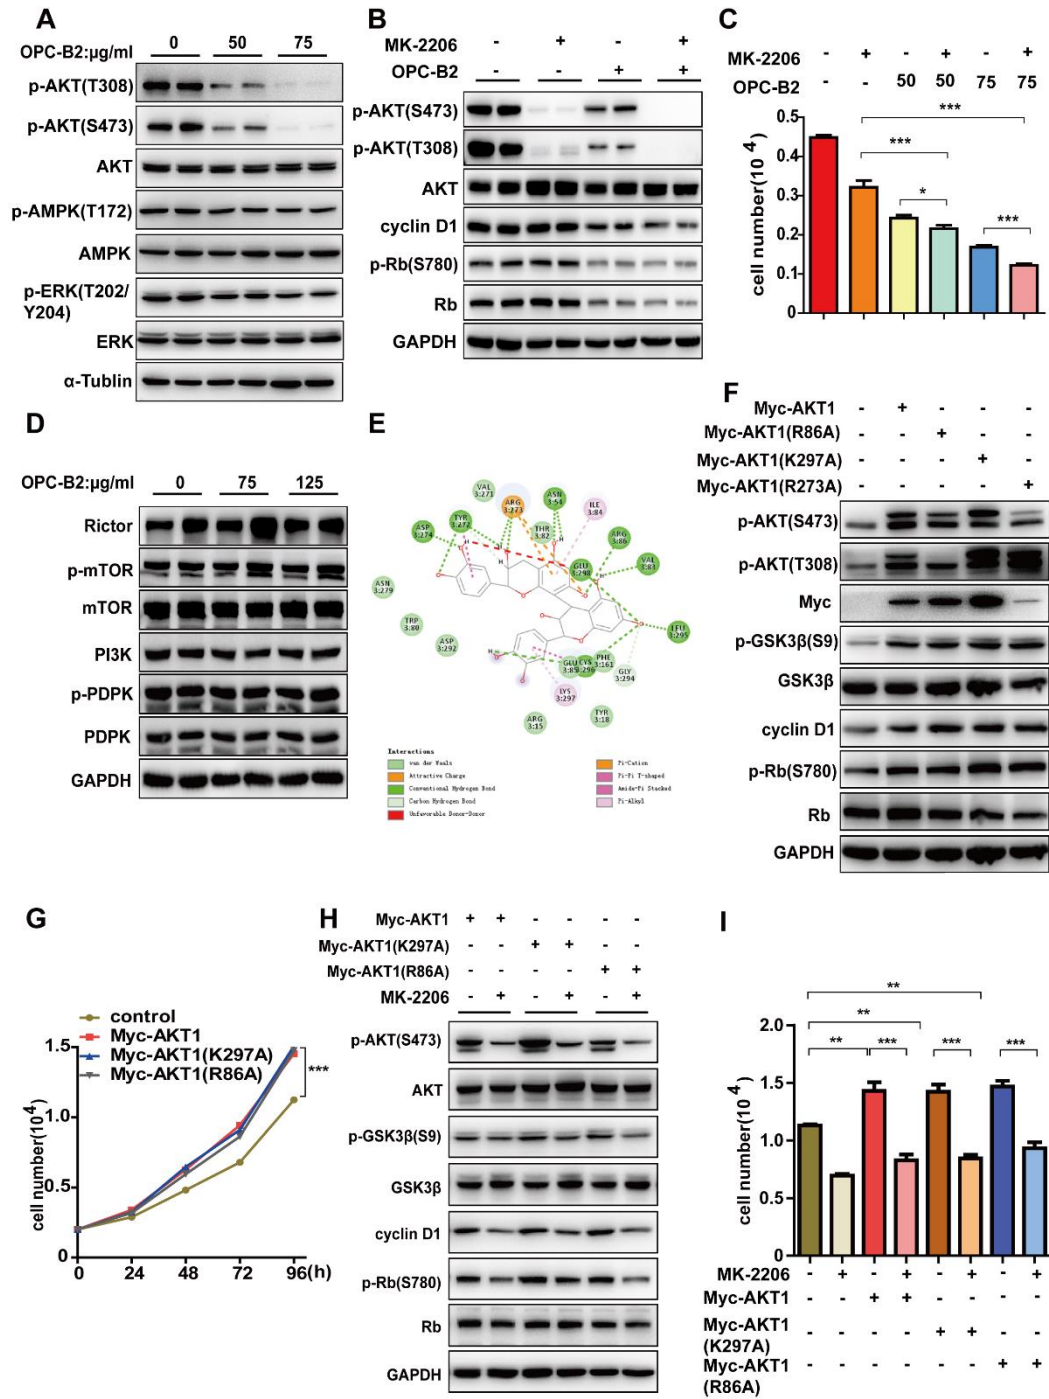

Figure S3:

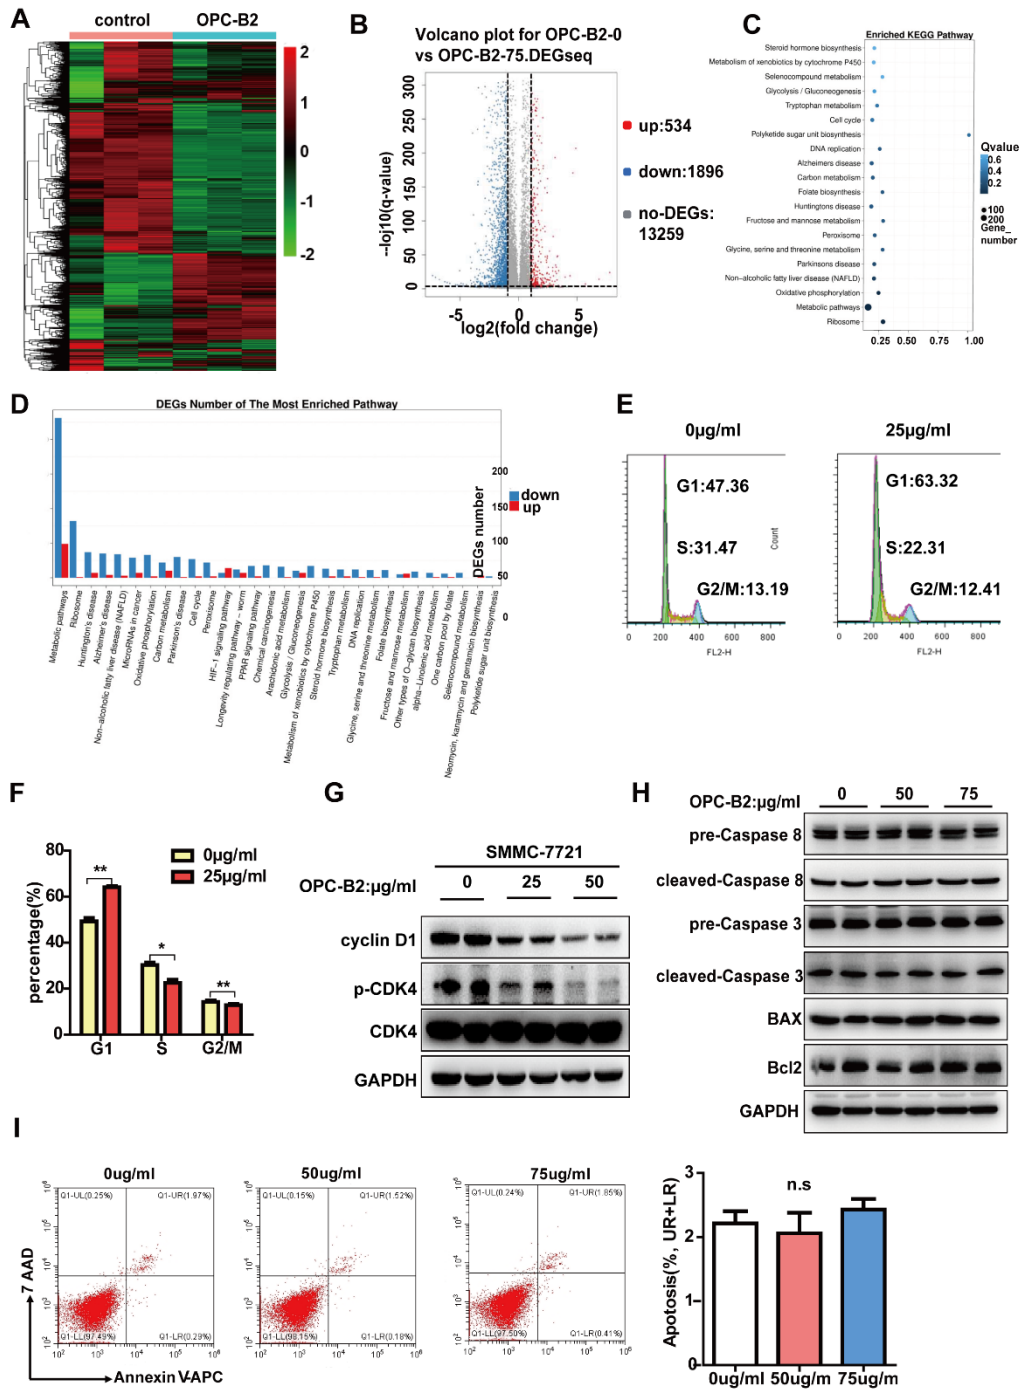

**Figure S4:**

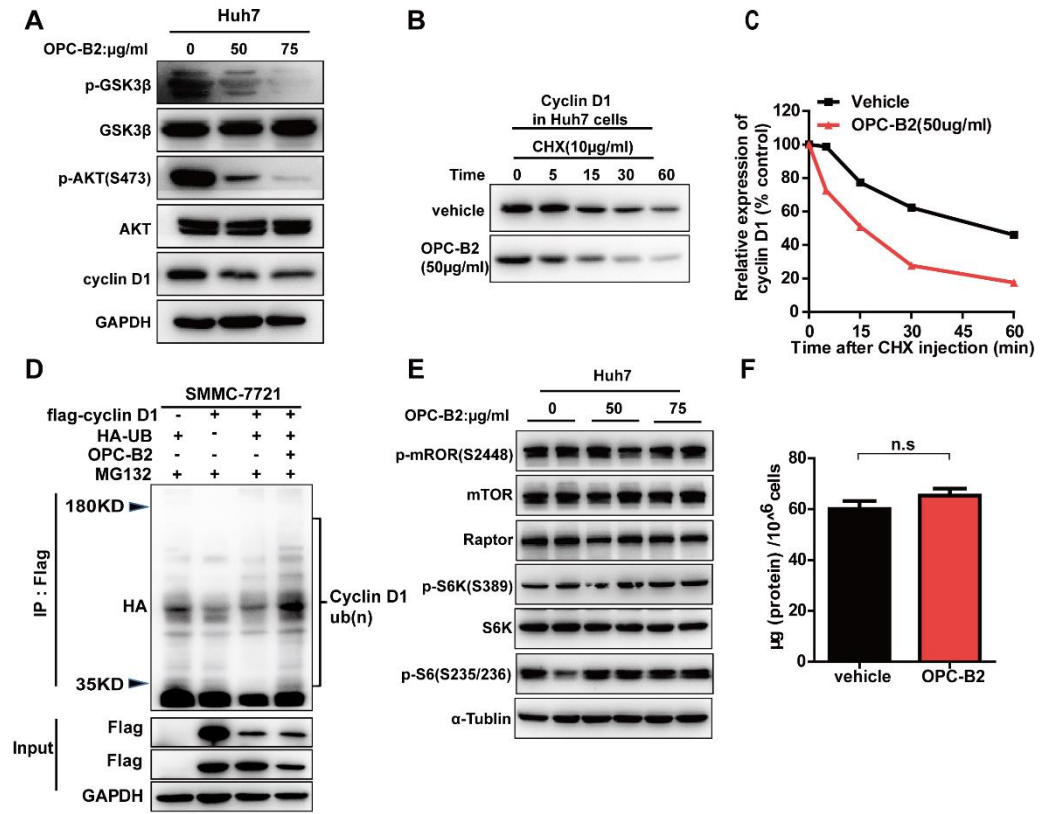

Figure S5:

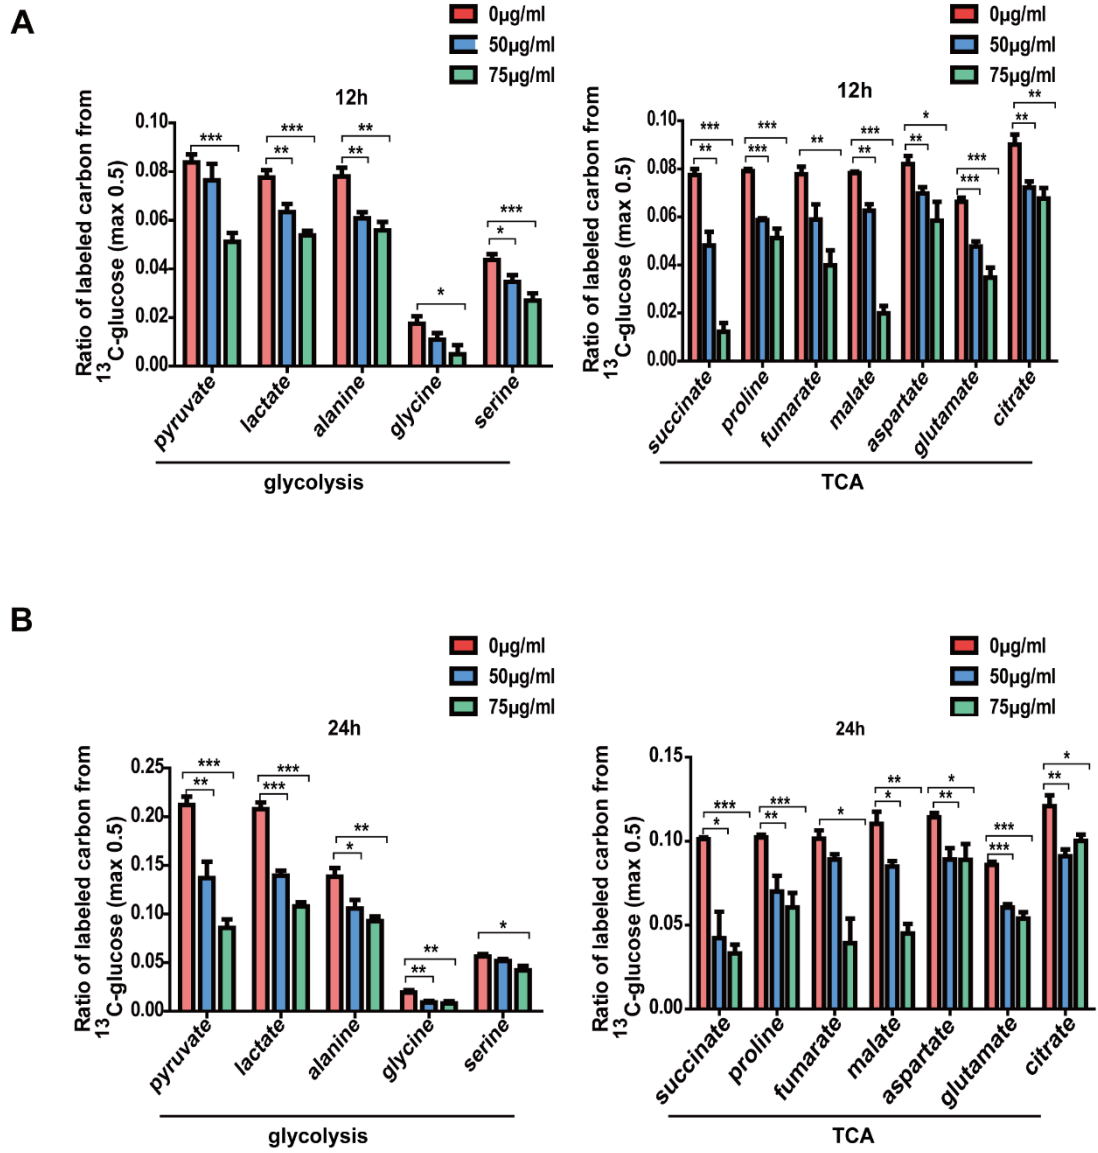



Figure S6:

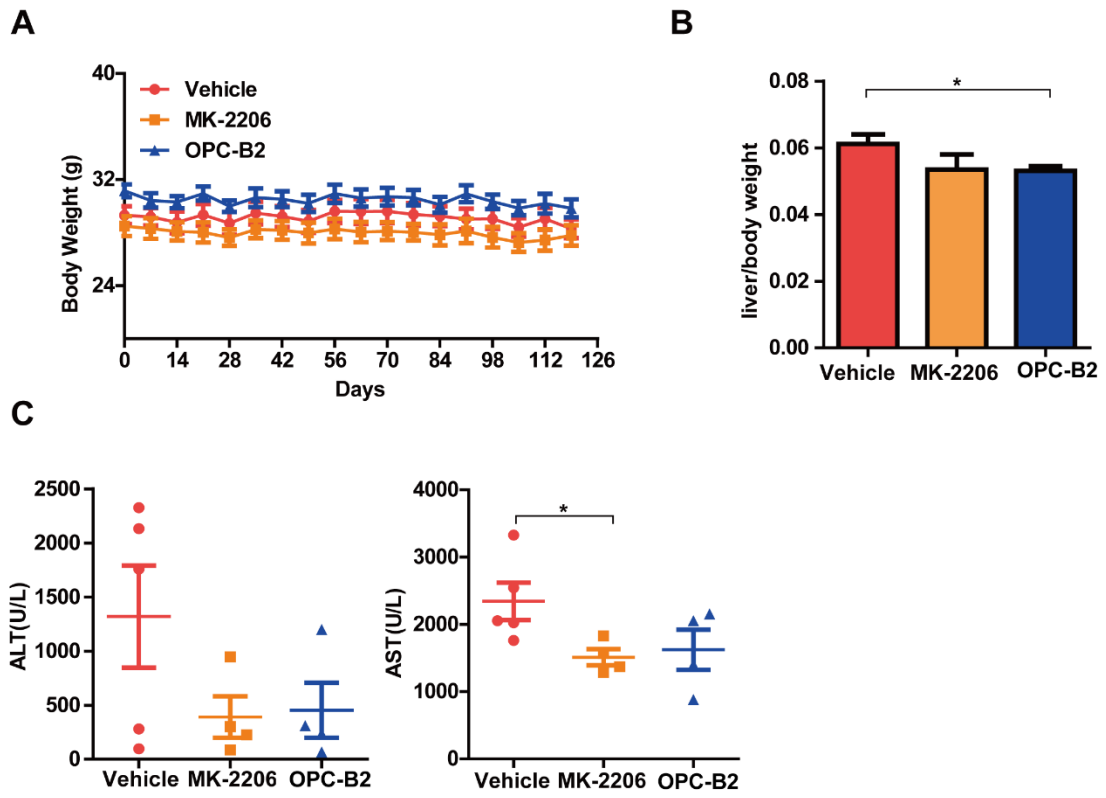

**Table S1: The total interaction energy between ligands and receptor using molecular dynamic simulation**

| <b>Ligand</b> | <b>Receptor</b> | <b>Total Interaction Energy (kcal/mol)</b> | <b>Total VDW Interaction Energy (kcal/mol)</b> | <b>Total Electrostatic Interaction Energy (kcal/mol)</b> |
|---------------|-----------------|--------------------------------------------|------------------------------------------------|----------------------------------------------------------|
| OPC-B2        | AKT1 (3O96)     | -464.02753                                 | -28.23306                                      | -435.79447                                               |

**Table S2: The specific information of the interaction sites and energies between the ligands and receptor in molecular dynamic simulation of OPC-B2 and AKT1**

| Ligands | Residue of 3O96 | Interaction Energy (kcal/mol) | VDW Interaction Energy (kcal/mol) | Electrostatic Interaction Energy (kcal/mol) |
|---------|-----------------|-------------------------------|-----------------------------------|---------------------------------------------|
| OPC-B2  | 3_ASN54         | -20.908554                    | -1.301405                         | -19.607149                                  |
|         | 3_VAL83         | 2.324731                      | -0.402495                         | 2.727226                                    |
|         | 3_ILE84         | -12.937332                    | -5.639400                         | -7.297932                                   |
|         | 3_ARG86         | -51.251030                    | -1.543698                         | -49.707333                                  |
|         | 3_TYR272        | -0.513667                     | 0.790376                          | -1.304042                                   |
|         | 3_ARG273        | -94.616402                    | -6.316353                         | -88.300049                                  |
|         | 3_ASP274        | -8.820487                     | -3.979322                         | -4.841166                                   |
|         | 3_GLY294        | -39.505688                    | -1.613553                         | -37.892136                                  |
|         | 3_LEU295        | -26.351521                    | -0.321499                         | -26.030020                                  |
|         | 3_CYS296        | -32.409126                    | -2.410020                         | -29.999105                                  |
|         | 3_LYS297        | -106.833504                   | -1.890340                         | -104.943161                                 |
|         | 3_GLU298        | 37.690502                     | 1.080339                          | 36.610165                                   |
|         | W_TIP1209       | -6.077793                     | -0.863999                         | -5.213795                                   |
|         | W_TIP1817       | -1.599456                     | -0.786087                         | -0.813368                                   |
|         | W_TIP4017       | -4.126231                     | -0.852174                         | -3.274057                                   |
|         | W_TIP4019       | -26.651405                    | -0.246958                         | -26.404446                                  |
|         | W_TIP4281       | -6.561630                     | -1.043406                         | -5.518224                                   |
|         | W_TIP4293       | -19.429232                    | 0.078444                          | -19.507675                                  |
|         | W_TIP6149       | -34.492458                    | -0.572381                         | -33.920074                                  |
|         | W_TIP7839       | -10.957253                    | -0.399127                         | -10.558125                                  |

\*3 is the abbreviation of AKT1 (3O96) and OPC represents procyanidine. In 3\_XXX123, 3 represents AKT1(3O96), XXX represents the abbreviation of amino acid molecule, 123 represents the serial number of this amino acid molecule on AKT1.

**Table S3: Reagents used in this study, related to Figure 1-5 and Figure S1-6.**

| Reagents                                             | Source                       | Cat         |
|------------------------------------------------------|------------------------------|-------------|
| MK-2206                                              | Selleck                      | S1078       |
| His-AKT1 Recombinant protein                         | Merck                        | 14-276-D    |
| cell counting Kit-8 (CCK8)                           | Bimake                       | B34304      |
| Enhanced BCA Protein Assay Kit                       | Beyotime Biotechnology       | P0009       |
| Endotoxin-free plasmid DNA small-lifting medium kit  | LifeFeng                     | DK312-01    |
| TIANpure Mini Plasmid Kit                            | TIANGEN                      | DP1-7-02    |
| [U- <sup>13</sup> C <sub>6</sub> ]-glucose           | Cambridge Isotope Laboratory | PR-28579    |
| MG132                                                | TOCRIS Bioscience            | 1748        |
| Trypsin 0.25% EDTA                                   | Invitrogen                   | 25200056    |
| LIPOFECTAMINE 2000                                   | Invitrogen                   | 11668019    |
| Opti-MEM® Reduced                                    | Invitrogen                   | 11058-021   |
| Proanthocyanidin B2                                  | sigma                        | 42157-1MG-F |
| D-Glucose Kit                                        | R-Biopharm                   | 10716251035 |
| Cell Cycle and Apoptosis Analysis Kit                | Beyotime                     | C1052       |
| O-Isobutylhydroxylamine Hydrochloride                | TCI                          | 6084-58-8   |
| N-tert-butyldimethylsilyl-N-methyltrifluoroacetamide | Sigma                        | 00942       |
| FITC Annexin V Apoptosis Detection Kit I             | BD Pharmingen                | 556547      |

**Table S4: Antibodies used in this study, related to Figure 2-5 and Figure S2-4.**

| <b>Antibodies</b>                                                                        | <b>Source</b>  | <b>Cat</b> | <b>Dilution ratio</b> |
|------------------------------------------------------------------------------------------|----------------|------------|-----------------------|
| Phosphor-AKT(Ser473)                                                                     | cell signaling | 13038      | 1:1000                |
| phosphor-AKT (Thr308)                                                                    | cell signaling | 4060       | 1:1000                |
| AKT                                                                                      | cell signaling | 4685       | 1:1000                |
| Phosphor-p44/42MAPK(ERK1/2)<br>(Thr202/Tyr204)                                           | cell signaling | 4370       | 1:1000                |
| p44/42MAPK(ERK1/2)                                                                       | cell signaling | 4695       | 1:1000                |
| Phosphor-AMPK $\alpha$ (Thr172)                                                          | cell signaling | 2535       | 1:1000                |
| AMPK $\alpha$                                                                            | cell signaling | 2532       | 1:1000                |
| cyclin D1                                                                                | Abcam          | ab134175   | 1:1000                |
| Rb                                                                                       | cell signaling | 9313       | 1:1000                |
| phosphor-Rb (Ser780)                                                                     | cell signaling | 8180       | 1:1000                |
| phosphor-CDK4 (Thr172)                                                                   | SAB            | 12403      | 1:500                 |
| CDK4                                                                                     | Proteintech    | 11026-1-AP | 1:1000                |
| Phosphor-GSK3 $\beta$ (Ser9)                                                             | cell signaling | 5558       | 1:1000                |
| GSK3 $\beta$                                                                             | cell signaling | 12456      | 1:1000                |
| Hexokinase 1 (HK1)                                                                       | Proteintech    | 19662-1-AP | 1:1000                |
| HA-Tag (C29F4) Rabbit mAb                                                                | cell signaling | 3724       | 1:1000                |
| phosphor-mTOR(Ser2448)                                                                   | cell signaling | 5536       | 1:1000                |
| mTOR                                                                                     | cell signaling | 2972       | 1:1000                |
| Rictor                                                                                   | cell signaling | 9476       | 1:1000                |
| PI3K                                                                                     | Proteintech    | 20584-1-AP | 1:1000                |
| phosphor-PDPK1                                                                           | cell signaling | 3438       | 1:1000                |
| PDPK1                                                                                    | cell signaling | 5652       | 1:1000                |
| GAPDH                                                                                    | Proteintech    | 60004-1-AP | 1:5000                |
| Raptor                                                                                   | Proteintech    | 20984-1-AP | 1:1000                |
| phosphor-S6K(Thr398)                                                                     | cell signaling | 9209       | 1:1000                |
| S6K                                                                                      | cell signaling | 2708       | 1:1000                |
| phosphor-S6(S235/236)                                                                    | cell signaling | 4858       | 1:1000                |
| BAX                                                                                      | Proteintech    | 50599-2-Ig | 1:1000                |
| BCL2                                                                                     | Proteintech    | 12789-1-AP | 1:1000                |
| Caspase 8                                                                                | Proteintech    | 13423-1-AP | 1:1000                |
| Caspase 3                                                                                | Proteintech    | 19677-1-AP | 1:1000                |
| $\alpha$ -tublin                                                                         | Proteintech    | 11224-1-AP | 1:1000                |
| $\beta$ -actin                                                                           | Proteintech    | 60008-1-AP | 1:5000                |
| HRP-conjugated Affinipure Goat<br>Anti-Rabbit IgG (H+L)                                  | Proteintech    | SA00001-2  | 1:5000                |
| Goat anti-mouse IgG (H+L), HRP<br>conjugated                                             | Proteintech    | SA00001-1  | 1:5000                |
| DYKDDDDK (Flag)-Tag Mouse                                                                | Abmart         | M20008     | 1:1000                |
| IPKine™ HRP conjugated Goat<br>Anti-Mouse IgG light chain specific<br>secondary antibody | Abbkine        | A25012     | 1:5000                |
